# Supplementary material for: Matching Voters with Parties and Candidates: Voting Advice Applications in a Comparative Perspective
Source: Royal Society of Chemistry journal article supplement (doi:10.1039/d4ra03460k), 2014-01-01
Supplement: d4ra03460k1.pdf [file d4ra03460k1.pdf]

## Enhanced hydrogen storage property of $\text{MgH}_2$ by the nanocatalyst $\text{BaCrO}_4$

Chenxi Liang<sup>a,b,c</sup>, Zhenbin Wang<sup>a,b,c</sup>, Mingjin Zhang<sup>a,b,c\*</sup>, Cunhua Ma<sup>a,b,c\*</sup>

<sup>a</sup> School of Chemistry and Chemical Engineering, Qinghai Normal University, Xining 810008  
China

<sup>b</sup> Academy of Plateau Science and Sustainability, People's Government of Qinghai Province &  
Beijing Normal University, Xining, 810016, China

<sup>c</sup> Qinghai Provincial Key Laboratory of Advanced Technology and Application of Environment  
Functional Materials, Xining 810008, China

\*Corresponding author: zhangmingjin@qhnu.edu.cn

20211001@qhnu.edu.cn

Tel.: +86 / (0)971-5213524

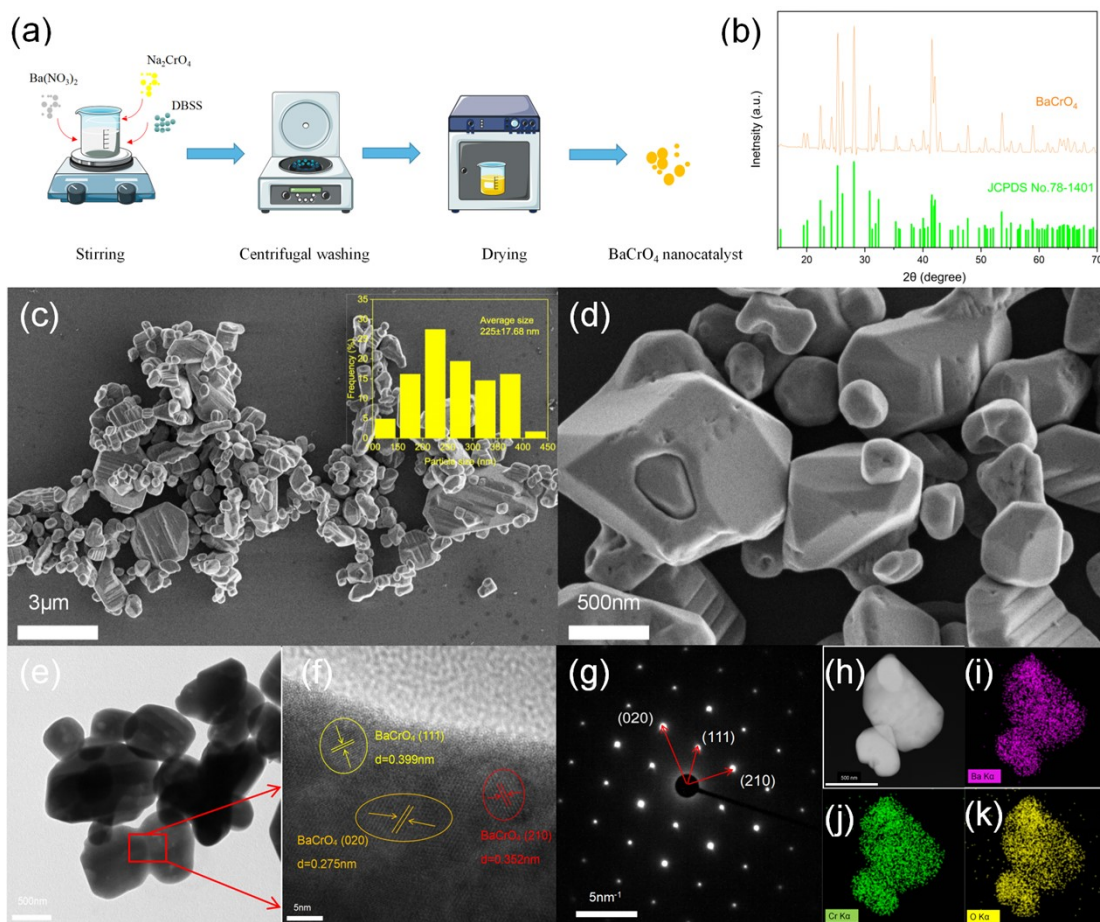

Fig. S1 (a) Preparation process of the  $\text{BaCrO}_4$  nanocatalyst, (b) XRD patterns, (c-d) SEM profiles and particle size distribution, (e-f) HRTEM image, (g) SAED image and (h-k) EDS mapping graphs of  $\text{BaCrO}_4$  nanocatalyst.

Fig S2 EDS element composition of BaCrO<sub>4</sub> nanocatalyst.

| Sample                          | Element | Atom % |
|---------------------------------|---------|--------|
| BaCrO <sub>4</sub> nanocatalyst | Ba      | 17.00  |
|                                 | Cr      | 13.40  |
|                                 | O       | 69.60  |
|                                 | Total   | 100    |

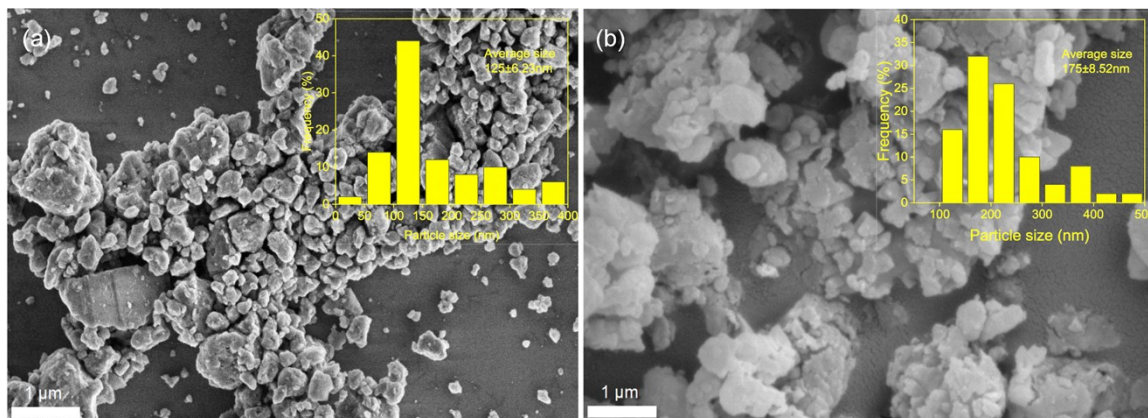

Fig. S3 SEM images and particle size distribution of (a) as-milled and (b) cycling states of 10 wt% BaCrO<sub>4</sub> introduced-MgH<sub>2</sub>.

Fig S4 EDS element composition of 10 wt% BaCrO<sub>4</sub>-introduced MgH<sub>2</sub> at different states.

| Sample                                                                          | Element | Atom % |
|---------------------------------------------------------------------------------|---------|--------|
| 10 wt% BaCrO <sub>4</sub> -introduced MgH <sub>2</sub><br>after milling         | Ba      | 1.00   |
|                                                                                 | Cr      | 0.70   |
|                                                                                 | O       | 11.50  |
|                                                                                 | Mg      | 86.80  |
|                                                                                 | Total   | 100    |
| 10 wt% BaCrO <sub>4</sub> -introduced MgH <sub>2</sub><br>after dehydrogenation | Ba      | 0.88   |
|                                                                                 | Cr      | 0.71   |
|                                                                                 | O       | 30.24  |
|                                                                                 | Mg      | 68.17  |
|                                                                                 | Total   | 100    |
| 10 wt% BaCrO <sub>4</sub> -introduced MgH <sub>2</sub><br>after rehydrogenation | Ba      | 0.96   |
|                                                                                 | Cr      | 1.13   |
|                                                                                 | O       | 19.05  |
|                                                                                 | Mg      | 78.86  |
|                                                                                 | Total   | 100    |

Table S1 Bond length analysis of MgH<sub>2</sub> and 10 wt% BaCrO<sub>4</sub>-introduced MgH<sub>2</sub>.

| Material                                               | Average bond length of Mg-H |
|--------------------------------------------------------|-----------------------------|
| MgH <sub>2</sub>                                       | 1.935 Å                     |
| 10 wt% BaCrO <sub>4</sub> -introduced MgH <sub>2</sub> | 2.904 Å                     |
